# Supplementary material for: Palaeoseismic crisis in the Galera Fault (southern Spain): consequences in Bronze Age settlements?
Source: Copernicus journal article supplement (doi:10.5194/se-15-837-2024), 2024-07-16
Supplement: Supplementary file 1 [file S10 Supplement S10.docx]

**Supplement S10**

**RUB trench MAJOR earthquakes**


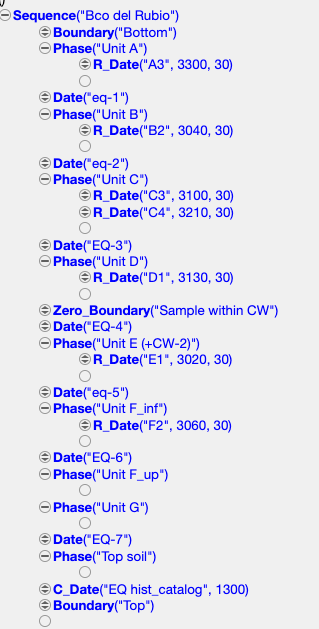


Plot()

{

Sequence("Bco del Rubio")

{

Boundary("Bottom");

Phase("Unit A")

{

R_Date("A3", 3300, 30);

};

Date("eq-1");

Phase("Unit B")

{

R_Date("B2", 3040, 30);

};

Date("eq-2");

Phase("Unit C")

{

R_Date("C3", 3100, 30);

R_Date("C4", 3210, 30);

};

Date("EQ-3");

Phase("Unit D")

{

R_Date("D1", 3130, 30);

};

Zero_Boundary("Sample within CW");

Date("EQ-4");

Phase("Unit E (+CW-2)")

{

R_Date("E1", 3020, 30);

};

Date("eq-5");

Phase("Unit F_inf")

{

R_Date("F2", 3060, 30);

};

Date("EQ-6");

Phase("Unit F_up")

{

};

Phase("Unit G")

{

};

Date("EQ-7");

Phase("Top soil")

{

};

C_Date("EQ hist_catalog", 1300);

Boundary("Top");

};

};
