# Supplementary material for: Palaeoseismic crisis in the Galera Fault (southern Spain): consequences in Bronze Age settlements?
Source: Copernicus journal article supplement (doi:10.5194/se-15-837-2024), 2024-07-16
Supplement: Supplementary file 2 [file S5 Supplement S5.docx]

**Supplement S5**

**PIL site, trench 1**


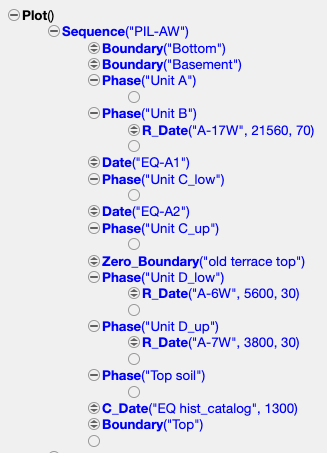


Plot()

{

Sequence("PIL-AW")

{

Boundary("Bottom");

Boundary("Basement");

Phase("Unit A")

{

};

Phase("Unit B")

{

R_Date("A-17W", 21560, 70);

};

Date("EQ-A1");

Phase("Unit C_low")

{

};

Date("EQ-A2");

Phase("Unit C_up")

{

};

Zero_Boundary("old terrace top");

Phase("Unit D_low")

{

R_Date("A-6W", 5600, 30);

};

Phase("Unit D_up")

{

R_Date("A-7W", 3800, 30);

};

Phase("Top soil")

{

};

C_Date("EQ hist_catalog", 1300);

Boundary("Top");

};

};
