# Supplementary material for: Palaeoseismic crisis in the Galera Fault (southern Spain): consequences in Bronze Age settlements?
Source: Copernicus journal article supplement (doi:10.5194/se-15-837-2024), 2024-07-16
Supplement: Supplementary file 3 [file S6 Supplement S6.docx]

Supplement S6

**PIL site, trench 3**


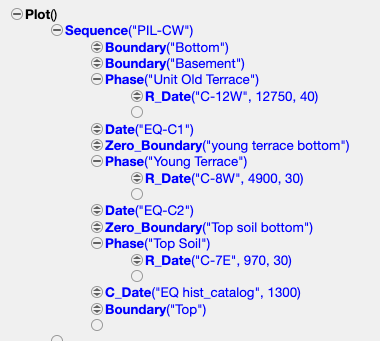


Plot()

{

Sequence("PIL-CW")

{

Boundary("Bottom");

Boundary("Basement");

Phase("Unit Old Terrace")

{

R_Date("C-12W", 12750, 40);

};

Date("EQ-C1");

Zero_Boundary("young terrace bottom");

Phase("Young Terrace")

{

R_Date("C-8W", 4900, 30);

};

Date("EQ-C2");

Zero_Boundary("Top soil bottom");

Phase("Top Soil")

{

R_Date("C-7E", 970, 30);

};

C_Date("EQ hist_catalog", 1300);

Boundary("Top");

};

};
