# Supplementary material for: Palaeoseismic crisis in the Galera Fault (southern Spain): consequences in Bronze Age settlements?
Source: Copernicus journal article supplement (doi:10.5194/se-15-837-2024), 2024-07-16
Supplement: Supplementary file [file se-15-837-2024-supplement-title-page.pdf › se-15-837-2024-supplement-title-page.pdf]

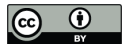

## *Supplement of*

# **Palaeoseismic crisis in the Galera Fault (southern Spain): consequences in Bronze Age settlements?**

**Ivan Martin-Rojas et al.**

*Correspondence to:* Ivan Martin-Rojas ([ivan.martin@ua.es](mailto:ivan.martin@ua.es))

- [se-15-837-2024-supplement-title-page.pdf](#)
- [S1 PIL-1-W-uninterpreted\\_1.jpg](#)
- [S10 Supplement S10.docx](#)
- [S2 Pil-1-W\\_interpreted\\_1.jpg](#)
- [S3 Pil-3-W-interpreted\\_1.jpg](#)
- [S4 Pil-3-W-uninterpreted\\_1.jpg](#)
- [S5 Supplement S5.docx](#)
- [S6 Supplement S6.docx](#)
- [S7 RUB-S\\_interpreted\\_1.jpg](#)
- [S8 RUB-S\\_uninterpreted\\_1.jpg](#)
- [S9 Supplement S9.docx](#)

The copyright of individual parts of the supplement might differ from the article licence.
